# Supplementary material
Source: HighWire-hosted journal article supplement (https://srh.bmj.com/highwire/filestream/143050/field_highwire_adjunct_files/0/bmjsrh-2023-201819supp001_data_supplement.pdf)
Supplement: bmjsrh-2023-201819supp001_data_supplement.pdf [file bmjsrh-2023-201819supp001_data_supplement.pdf]

| Supplementary table 1 Number of participating countries and participants |                            |                  |
|--------------------------------------------------------------------------|----------------------------|------------------|
| Country                                                                  | Potential participants (n) | participants (n) |
| Argentina                                                                | 845                        | 533              |
| Australia                                                                | 561                        | 318              |
| Botswana                                                                 | 344                        | 211              |
| Canada                                                                   | 163                        | 103              |
| China                                                                    | 827                        | 0                |
| Colombia                                                                 | 2452                       | 1168             |
| Czech                                                                    | 1862                       | 533              |
| Denmark                                                                  | 1001                       | 186              |
| France                                                                   | 1593                       | 1152             |
| Germany                                                                  | 612                        | 471              |
| Italy                                                                    | 329                        | 173              |
| Kenya                                                                    | 243                        | 0                |
| Latvia                                                                   | 1176                       | 695              |
| Luxembourg                                                               | 568                        | 201              |
| Malaysia                                                                 | 499                        | 133              |
| Mexico                                                                   | 1673                       | 841              |
| Moldova                                                                  | 244                        | 114              |
| Nigeria                                                                  | 231                        | 13               |
| Panama                                                                   | 960                        | 395              |
| Portugal                                                                 | 3323                       | 2209             |
| Singapore                                                                | 566                        | 111              |
| Spain                                                                    | 295                        | 24               |
| Sweden                                                                   | 1307                       | 473              |
| Uganda                                                                   | 212                        | 60               |
| Uruguay                                                                  | 696                        | 385              |
| USA                                                                      | 305                        | 170              |
| Egypt                                                                    | 31                         | 0                |
| Lebanon                                                                  | 54                         | 0                |
| Mozambique                                                               | 66                         | 0                |
| South Africa                                                             | 29                         | 0                |
| Total                                                                    | 23067                      | 10672            |
